# Supplementary material
Source: PubMed Central journal article supplement (PMC8903380)
Supplement: deac031_supplementary_figure_s11.pdf [file deac031_supplementary_figure_s11.pdf]

monthly live birth numbers in Northern Ireland (2015-May 2021)

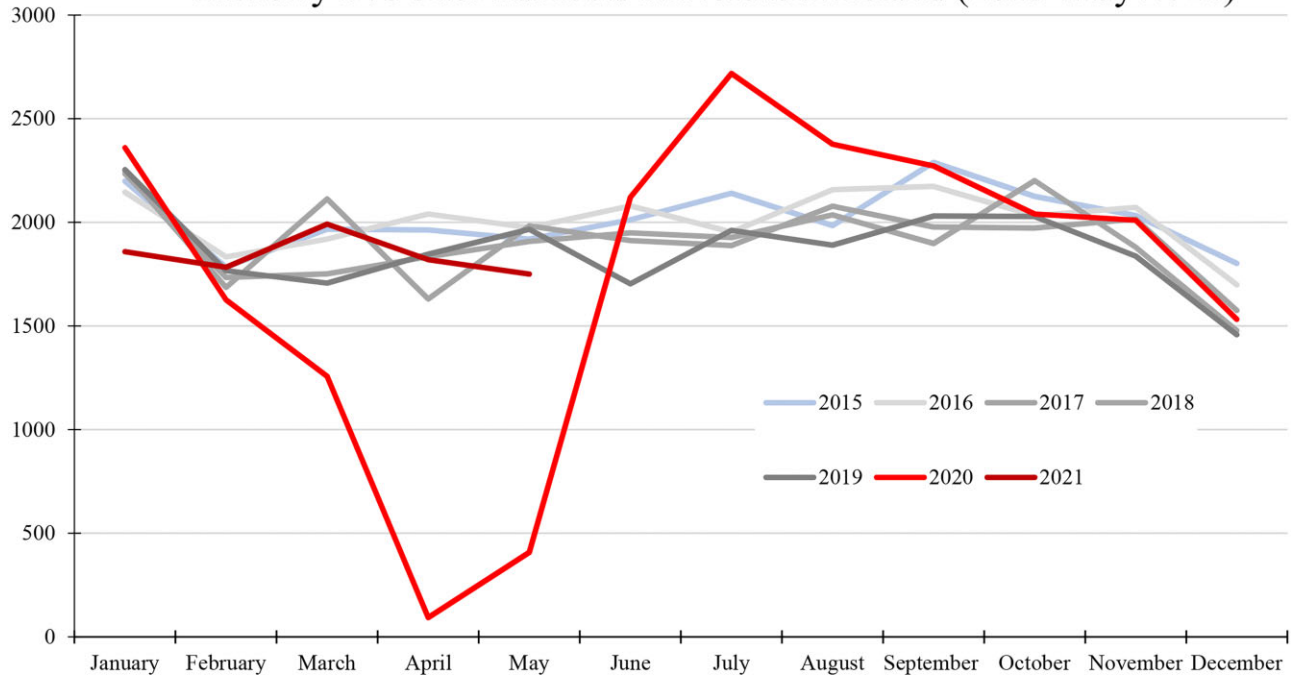

weekly mortality numbers in Northern Ireland (2015-2021)

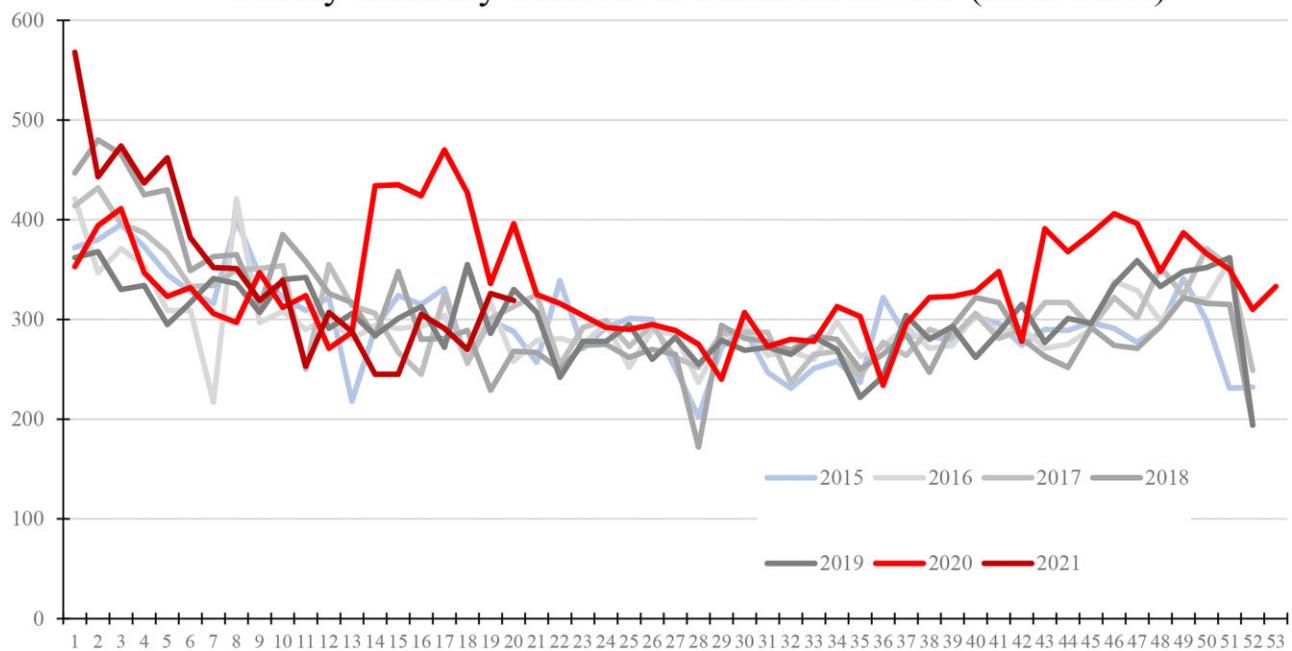

**Supplementary Figure S11.** Live birth and excess mortality numbers in Northern Ireland, 2015–2021, during the coronavirus disease 2019 pandemic.
